# Supplementary material
Source: PubMed Central journal article supplement (PMC2078062)
Supplement: oenvmed_63_2_149__1.pdf [file oenvmed_63_2_149__1.pdf]

**Additional recommended items: journal articles, videos, networks  
coordinating work on volcanic health hazards and associated  
websites**

**Journal articles**

An J, Ueda H, Matsuda K, Hasome H, Iwata M. Simulated impacts of SO<sub>2</sub> emissions from the Miyake volcano on concentration and deposition of sulfur oxides in September and October of 2000. *Atmospheric Environment* 2003;**37**:3039–3046.

Baxter PJ, Ing R, Falk F, French J, Stein GF, Bernstein RS, Merchant JA, Allard J. Mount St Helens eruptions, May 18 to June 12, 1980. *Journal of the American Medical Association* 1981;**246**:2585–2589.

Baxter PJ Ancia A. Human health and vulnerability in the Nyiragongo volcano crisis Democratic Republic of Congo 2002: Final Report to the World Health Organisation. Geneva: World Health Organisation, 2002  
(<http://www.who.int/disasters/repo/7827.doc> last accessed 9 June 2005).

Blong R. Volcanic hazards risk assessment. In: Scarpa R, Tilling RI, eds. *Monitoring and Mitigation of Volcanic Hazards*. Berlin Heidelberg: Springer-Verlag, New York, 1996:675–698.

Buist AS, Johnson LR, Vollmer WM, Sexton GJ, Kanarek PH. Acute effects of volcanic ash from Mount Saint Helens on lung function in children. *American Review of Respiratory Disease* 1983;**127**:714–719.

Buist AS, Vollmer WM, Johnson LR, Bernstein RS, McCamant LE. A four-year prospective study of the respiratory effects of volcanic ash from Mt. St. Helens.

*American Review of Respiratory Disease* 1986;**133**:526–534.

Cowie HA, Baxter PJ, Hincks T, Searl A, Sparks RSJ, Tran CL, Aspinall W, Woo G. Risk assessment for silicosis and exposure to volcanic ash on Montserrat, Report to the UK Department for International Development, London, 2003.

Heggie TW. Reported fatal and non-fatal incidents involving tourists in Hawaii Volcanoes National Park, 1992–2002. *Travel Medicine & Infectious Diseases* 2005;**3**(3):123–131.

Heggie TW, Heggie TM. Viewing lava safely: An epidemiology of hiker injury and illness in Hawaii Volcanoes National Park. *Wilderness & Environmental Medicine* 2004;**15**(2):77–81.

Horwell CJ, Sparks RSJ, Brewer TS, Llewellyn EW, Williamson BJ. The characterisation of respirable volcanic ash from the Soufriere Hills Volcano, Montserrat, with implications for health hazard. *Bulletin of Volcanology* 2003;**65**:346–362.

International Strategy for Disaster Reduction – ISDR. Living with Risk, A global review of disaster reduction initiatives. Geneva: ISDR, 2002.

(<http://www.undp.org/bcpr/disred/english/publications/publications.htm> last accessed 9 June 2005)

Kage S, Ito S, Kishida T, Kudo K, Ikeda N. A fatal case of hydrogen sulfide poisoning in a geothermal power plant. *Journal of Forensic Sciences* 1998;**43**(4):908–910.

Kerle N, van Wyk de Vries B, Oppenheimer C. New insight into the factors leading to the 1998 flank collapse and lahar disaster at Casita volcano, Nicaragua. *Bulletin of Volcanology* 2003;**65**:331–345.

Le Guern F, Tazieff H, Pierret RF. An example of health hazard: People Killed by Gas during a Phreatic Eruption: Diëng Plateau (Java, Indonesia) February 20th 1979. *Bulletin of Volcanology* 1982;**45**(2):153–156.

Loughlin SC, Baxter PJ, Aspinall WP, Darroux B, Harford CL, Miller AD. Eyewitness accounts of the 25 June 1997 pyroclastic flows and surges at Soufrière Hills Volcano, Montserrat, and implications for disaster management. In: Druitt TH, Kokelaar BP, editors. *The eruption of Soufrière Hills Volcano, Montserrat, from 1995 to 1999*. London: Geological Society of London Memoirs, 2002:211–230.

Pickrell J. New Network Aims to Explore Hidden Perils. *Science* 2003;299(5615):2023. [DOI: 10.1126/science.299.5615.2023]

➤ **A short article about the International Volcanic Health Hazard Network.**

Post JD. *The last great subsistence crisis in the Western World*. Baltimore: The Johns Hopkins University Press, 1977.

Sigurdsson H, Devine JD, Tchoua FM, Presser TS, Pringle MKW, Evans WC. Origin of the lethal gas burst from Lake Monoun, Cameroun. *Journal of Volcanology and Geothermal Research* 1987;**31**:1–16.

Simkin T, Siebert L, Blong R. Volcano Fatalities-Lessons from the Historical Record. *Science* 2001;**291**(5502):255.

Small D, Naumann T. The global distribution of human population and recent volcanism. *Environmental Hazards* 2001;**3**:93–109.

Stephenson R, Burr G, Kawamoto M, Hills B. Exposures to Volcanic Emissions from Hawaiian Volcanoes: a NIOSH Health Hazard Evaluation. *Applied Occupational & Environmental Hygiene* 1991;**6**(6):408–410.

- **An occupational survey of park rangers in Hawaii Volcanoes National Park.**

Stokstad E. Dr. Doom's Gruesome House Calls. *Science* 2003;**299**(5615):2022–2023.

- **A profile of Dr Peter Baxter, leading medical expert in researching health risks from volcanoes.**

Tanguy J-C, Ribière Ch, Scarth A, Tjetjep WS. Victims from volcanic eruptions: a revised database. *Bulletin of Volcanology* 1998;**60**:137–144.

Voight B. The 1985 Nevado del Ruíz volcano catastrophe: anatomy and retrospection. *Journal of Volcanology and Geothermal Research* 1990;**42**:151–188.

## **Videos**

“*Understanding volcanic hazards*” and “*Reducing volcanic risk*”, both produced with support from UNESCO and the International Association of Volcanology and Chemistry of the Earth's Interior (IAVCEI). See the IAVCEI website (<http://www.iavcei.org/> last accessed 1 December 2005)

A two-part video "*Health planning for a volcanic crisis*", produced for the Pan American Health Organisation (<http://www.paho.org/English/PED/volcano.htm> last accessed 1 December 2005)

### **Networks coordinating work on volcanic health hazards**

#### **The International Volcanic Health Hazard Network (IVHHN)**

(<http://www.ivhhn.org> last accessed 1 December 2005))

The IVHHN is a Commission of the International Association of Volcanology and Chemistry of the Earth's Interior (IAVCEI). Its website provides contact details for experts in these fields and has guidelines and information on the following health topics:

- The Health Hazards of Volcanic Emissions
- The Health Hazards of Volcanic Ash: A guide for the medical and veterinary communities
- Guidelines on ash clearance techniques
- Recommended dust masks
- Review of exposure guidelines for volcanic gases
- Database of volcanic disasters and incidents in the 20th Century

#### **Cities and Volcanoes Commission of the International Association of Volcanology and Chemistry of the Earth's Interior (IAVCEI)**

(<http://www.iavcei.org/citvolc.htm> last accessed 1 December 2005 )

This Commission is open to all members of IAVCEI and its stated aims are:

to provide a linkage between the volcanology community and emergency managers

to serve as a conduit for exchange of ideas and experience between “volcano cities” to promote multi-disciplinary applied research, involving the collaboration of physical and social scientists and city officials.

### Cities on Volcanoes meetings

These are organised by the Cities and Volcanoes Commission of IAVCEI, but are also open to non-members of IAVCEI. At the time of writing, the fourth meeting will be convened in Quito in January 2006. These international meetings have been held every 2–3 years since 1995 and bring together a range of professionals and researchers including volcanologists, health professionals and emergency managers.
